# Supplementary material for: Genomic ancestry as a predictor of haemodynamic profile in heart failure
Source: PubMed Central journal article supplement — Open Heart. 2016 Jul 26;3(2):e000434. doi: 10.1136/openhrt-2016-000434 (PMC4975862; doi:10.1136/openhrt-2016-000434), 2016-07-26
Supplement: openhrt-2016-000434supp3.pdf [file openhrt-2016-000434supp3.pdf]

**Supplemental Material 3. Sensitivity analysis - Multiple linear regression of medial E/e' ratio as the dependent variable in a sample without Chagas disease.**

| Model 1: Variables                               | Beta   | CI 95%        | P value          |
|--------------------------------------------------|--------|---------------|------------------|
| Age (10y)                                        | -0.02  | -0.052; 0.011 | 0.211            |
| Chronic renal failure                            | 4.132  | 0.159; 8.105  | <b>0.042</b>     |
| Gender                                           | -0.01  | -0.803; 0.783 | 0.980            |
| MAP (1mmHg)                                      | 0.05   | 0.026; 0.074  | <b>&lt;0.001</b> |
| NYHA CF (III/IV)                                 | 1.605  | 0.595; 2.614  | <b>0.002</b>     |
| LV mass index (1 kg/m <sup>2</sup> )             | 0.003  | -0.005; 0.011 | 0.409            |
| African ancestry (10%)                           | 0.224  | 0.056; 0.391  | <b>0.009</b>     |
| Ejection fraction (%)                            | -0.058 | -0.1; -0.017  | <b>0.006</b>     |
| Interaction: age (10y) and chronic renal failure | -0.052 | -0.118; 0.013 | 0.115            |

MAP= mean arterial pressure; NYHA FC= New York Heart Association Functional

Class; LV= Left ventricle

R<sup>2</sup> = 19,3% AIC = 1177

| Model 2: Variables                               | Beta   | CI 95%        | P value          |
|--------------------------------------------------|--------|---------------|------------------|
| Age (10y)                                        | -0.028 | -0.059; 0.002 | 0.071            |
| Chronic renal failure                            | 3.761  | -0.242; 7.764 | 0.065            |
| Gender                                           | -0.232 | -1.006; 0.543 | 0.556            |
| MAP (1mmHg)                                      | 0.053  | 0.029; 0.077  | <b>&lt;0.001</b> |
| NYHA CF (III/IV)                                 | 1.603  | 0.581; 2.624  | <b>0.002</b>     |
| LV mass index (1 kg/m <sup>2</sup> )             | 0.004  | -0.004; 0.011 | 0.384            |
| Self-declared color (Non White)                  | 0.695  | -0.059; 1.449 | 0.071            |
| Ejection fraction (%)                            | -0.058 | -0.1; -0.017  | <b>0.006</b>     |
| Interaction: age (10y) and chronic renal failure | -0.044 | -0.11; 0.021  | 0.183            |

MAP= mean arterial pressure; NYHA FC= New York Heart Association Functional

Class; LV= Left ventricle

R<sup>2</sup> = 18,0% AIC = 1181
